# Supplementary material
Source: PubMed Central journal article supplement (PMC10922388)
Supplement: NIHMS1954719-supplement-1.pdf [file NIHMS1954719-supplement-1.pdf]

**Supplemental Table 1.** Matching adherence facilitators to previously published adherence barriers within the Capability, Opportunity, Motivation, Behavior conceptual model.

|                                                  | <b>Barriers</b>                                                                                                                                                                 | <b>Facilitators</b>                                                                                                                                                                                                                                                                                                          |
|--------------------------------------------------|---------------------------------------------------------------------------------------------------------------------------------------------------------------------------------|------------------------------------------------------------------------------------------------------------------------------------------------------------------------------------------------------------------------------------------------------------------------------------------------------------------------------|
| <b>Capability: Medication access</b>             | <b>Insurance and Costs*</b><br><b>Pharmacy issues*</b><br><b>Clinic factors^</b>                                                                                                | <b>Medication Access*</b><br>-Payment assistance programs, GoodRx<br>-Prioritizing most important drugs to fill<br>-Using pharmacies with sufficient specialty pills<br>-Easy access to provider and pharmacist                                                                                                              |
|                                                  | <b>Logistics*</b><br>-Busyness and forgetting<br>-Schedule variability<br>-Not refilling on time<br><b>Physical limitations§</b><br>-Fatigue<br>-Mobility issues                | <b>Medication reminders*</b><br>-Pillbox, alarm, mobile app, calendar, visual reminders, having a routine<br>-Always carrying medicines on hand<br>-Pre-sorted medication service<br>-Automatic refills or reminders<br><b>Social support*</b><br>-Encouragement, reminders, and physical assistance from family and friends |
| <b>Opportunity: Taking medications regularly</b> | <b>Medication attributes*</b><br>-Food requirements<br>-Number and size of pills<br>-Pill frequency<br><b>Side effects*</b>                                                     | <b>Medication properties*</b><br>-Easier to take regimen<br>-Fewer side effects<br>-Resources to help deal with side effects                                                                                                                                                                                                 |
|                                                  | <b>Medication necessity and effectiveness*</b><br>-Medication not necessary when feeling good<br>-No immediate consequences of stopping medications<br>- Medication not working | <b>Physical and mental health*</b><br>-Avoiding negative consequences<br>-Maintaining wellness and caregiver role<br>-Tapping into future goals<br>-Ability to decrease prednisone use<br>-Psychiatric care                                                                                                                  |
| <b>Motivation: beliefs and attitudes</b>         | <b>Mental fatigue*</b><br>-Tired of taking medications<br>-Denial<br>-Unready to prioritize health<br>-Defeatist attitude                                                       | <b>Empowerment ^</b>                                                                                                                                                                                                                                                                                                         |
|                                                  | <b>Limited patient knowledge^</b><br>-Lack of understanding<br>-Insufficient patient education in clinic                                                                        | <b>Patient education and communication^</b><br>-Attention to health literacy<br>-Effective communication<br>-Clinic- and system-level changes<br>-Supplemental education resources                                                                                                                                           |

|                                                  | <b>Barriers</b>                                                                                                                                   | <b>Facilitators</b>                                                                                              |
|--------------------------------------------------|---------------------------------------------------------------------------------------------------------------------------------------------------|------------------------------------------------------------------------------------------------------------------|
| <b>Motivation:<br/>beliefs and<br/>attitudes</b> | <b>External influences*</b><br>-Negative outside information<br>-Religion or alternative medicine<br>-Lack of trust in providers or health system | <b>Patient-provider relationship*</b><br>-Building trust<br>-Shared decision making<br>-Engaged and caring staff |

\*Reported by both patients and providers/staff; §Reported by patients only; ^Reported by providers/staff only. Most commonly described barriers and facilitators are highlighted in grey.
